# Supplementary material
Source: publisher site journal article supplement (https://www.dovepress.com/get_supplementary_file.php?f=287280.xlsx)
Supplement: Supplementary file 1 [file get_supplementary_file.php]

## Sheet: Excluded- types
Excluded due to type (51 articles)
No.	Authors	Year	Title							Journal					Type		Remarks
1	I. O. Godfroid	1997	In praise of wine?							Presse Medicale					Review		Not relevant
2	R. Farré, I. Frasquet and A. Sánchez	2004	Propolis and human health							Ars Pharmaceutica					Review		Not relevant
3	A. Huntley	2004	The safety of black cohosh (Actaea racemosa, Cimicifuga racemosa)							Expert Opinion on Drug Safety					Review		Not relevant
4	I. A. Siddiqui, F. Afaq, V. M. Adhami, N. Ahmad and H. Mukhtar	2004	Antioxidants of the Beverage Tea in Promotion of Human Health							Antioxidants and Redox Signaling					Review		Not relevant
5	N. Plock and C. Kloft	2005	Microdialysis - Theoretical background and recent implementation in applied life-sciences							European Journal of Pharmaceutical Sciences					Review		Not relevant
6	A. R. Setty and L. H. Sigal	2005	Herbal medications commonly used in the practice of rheumatology: Mechanisms of action, efficacy, and side effects							Seminars in Arthritis and Rheumatism					Review		Not relevant
7	O. Werz and D. Steinhilber	2005	Pharmacological intervention with 5-lipoxygenase: New insights and novel compounds							Expert Opinion on Therapeutic Patents					Review		Not relevant
8	B. H. Ali and M. S. Al Moundhri	2006	Agents ameliorating or augmenting the nephrotoxicity of cisplatin and other platinum compounds: A review of some recent research							Food and Chemical Toxicology					Review		Not relevant
9	J. X. Li and Z. Y. Yu	2006	Cimicifugae Rhizoma: From origins, bioactive constituents to clinical outcomes							Current Medicinal Chemistry					Review		Not relevant
10	X. Li, M. Dong, Y. Liu, Q. W. Shi and H. Kiyota	2007	Structures and biological properties of the chemical constituents from the genus Wedelia							Chemistry and Biodiversity					Review		Not relevant
11	S. Omoigui	2007	The Interleukin-6 inflammation pathway from cholesterol to aging - Role of statins, bisphosphonates and plant polyphenols in aging and age-related diseases							Immunity and Ageing					Review		A very short description on hydroxycinnamic acids/CA. No biological activities reported
12	P. Anand, S. G. Thomas, A. B. Kunnumakkara, C. Sundaram, K. B. Harikumar, B. Sung, S. T. Tharakan, K. Misra, I. K. Priyadarsini, K. N. Rajasekharan and B. B. Aggarwal	2008	Biological activities of curcumin and its analogues (Congeners) made by man and Mother Nature							Biochemical Pharmacology					Review		Not relevant
13	Orsolic, N., Benkovic, V., Horvat-Knezevic, A. and Basic, I.	2008	Propolis and Related Flavonoids as Radioprotective Agents							Herbal Radiomodulators: Applications in Medicine, Homeland Defence and Space					Book chapter		Not relevant
14	R. F. Guerrero, M. C. García-Parrilla, B. Puertas and E. Cantos-Villar	2009	Wine, resveratrol and health: A review							Natural Product Communications					Review		Not relevant
15	N. G. Li, Z. H. Shi, Y. P. Tang and J. A. Duan	2009	Selective matrix metalloproteinase inhibitors for cancer							Current Medicinal Chemistry					Review		Not relevant
16	Q. Jabeen and N. Aslam	2011	The pharmacological activities of prunes: The dried plums							Journal of Medicinal Plants Research					Review		Summarized the effects of CA on spontaneously hypertensive stroke prone rat, nothing on bone
17	R. Prado, S. O. Francis, M. N. Mason, G. Wing, R. G. Gamble and R. Dellavalle	2011	Nonmelanoma skin cancer chemoprevention							Dermatologic Surgery					Review		Not relevant
18	Y. M. Zhao and Y. P. Shi	2011	Phytochemicals and biological activities of Dipsacus species							Chemistry and Biodiversity					Review		Not relevant
19	V. P. Bulgakov, Y. V. Inyushkina and S. A. Fedoreyev	2012	Rosmarinic acid and its derivatives: Biotechnology and applications							Critical Reviews in Biotechnology					Review		Not relevant
20	C. P. Chuu, H. P. Lin, L. C. Su, C. Y. Lin, C. Huo, Y. Y. Kuo and S. C. Chu	2012	Targeting Akt signaling for treatment of advanced prostate cancer cells with caffeic acid phenethyl ester							Prostate Cancer Cells: Detection, Growth and Treatment					Book chapter		Not relevant
21	R. W. Knackstedt, V. R. Moseley and M. J. Wargovich	2012	Epigenetic mechanisms underlying diet-sourced compounds in the prevention and treatment of gastrointestinal cancer							Anti-Cancer Agents in Medicinal Chemistry					Review		Anticancer effects of CA on colon cancer cells by inhibiting HDAC and DNA methyltransferases
22	M. J. Leach and V. Moore	2012	Black cohosh (Cimicifuga spp.) for menopausal symptoms							Cochrane Database Syst Rev					Review		Mentioned the presence of CA in the rhizome of Black cohosh, nothing on bone
23	U. Uysal, S. Seremet, J. W. Lamping, J. M. Adams, D. Y. Liu, R. H. Swerdlow and D. J. Aires	2013	Consumption of polyphenol plants may slow aging and associated diseases							Current Pharmaceutical Design					Review		Not relevant
24	M. A. Al-Sha'er	2014	Could the cancer be a chronic immune disorder? Rather than a serious malignant disease							Der Pharma Chemica					Review		Not relevant
25	Y. Guo, Y. Li, L. Xue, R. P. Severino, S. Gao, J. Niu, L. P. Qin, D. Zhang and D. Brömme	2014	Salvia miltiorrhiza: an ancient Chinese herbal medicine as a source for anti-osteoporotic drugs							J Ethnopharmacol					Review		Discussed the effects of CA on bone by Wu et al 2012 [REF 37] and Folwarczna et al. 2009 [REF 50]
26	S. Patel	2014	Blueberry as functional food and dietary supplement: The natural way to ensure holistic health							Mediterranean Journal of Nutrition and Metabolism					Review		Not relevant
27	L. S. Vagish Kumar	2014	Propolis in dentistry and oral cancer management							North American Journal of Medical Sciences					Review		Summarized the antimicrobial and anticancer properties of CA and CAPE (from propolis) but nothing on bone health was reported
28	S. H. Cheng, M. Y. Barakatun-Nisak, J. Anthony and A. Ismail	2015	Potential medicinal benefits of Cosmos caudatus (Ulam Raja): A scoping review							Journal of Research in Medical Sciences					Review		Not relevant
29	S. Akyol, S. F. Kursunlu and O. Akyol	2016	Bone resorption, matrix metalloproteinases and caffeic acid phenethyl ester							Acta Orthop Traumatol Turc					Commentary		Commented on the role of CAPE on bone by Zawawi et al. 2015 [REF 56]; Article by Akyol et al. 2013 was not considered as they studied on chondrosarcoma; Ilhan et al. 2004 studied on experimental autoimmune encephalomyelitis-induced oxidative stess and Armutu et al. is another review article regarding antiinflammatory and immunomodulating activities of CAPE
30	Sipahioglu, S.	2016	Bone resorption, matrix metalloproteinases and caffeic acid phenethyl ester reply							Acta Orthop Traumatol Turc					Commentary		Non-related comments on CAPE
31	B. Özdemir, S. S. Yücel and Y. Okay	2016	Health properties of almond							Journal of Hygienic Engineering and Design					Review		Only mentioned the presence of CA in almond, not reporting bone protecting activity
32	B. C. Variya, A. K. Bakrania and S. S. Patel	2016	Emblica officinalis (Amla): A review for its phytochemistry, ethnomedicinal uses and medicinal potentials with respect to molecular mechanisms							Pharmacological Research					Review		Summarized the presence of CA in Emblica officinalis fruit without reporting bone-related biological activity
33	M. Yamaguchi	2016	The botanical molecule p-hydroxycinnamic acid as a new osteogenic agent: insight into the treatment of cancer bone metastases							Mol Cell Biochem					Review		Mentioned 1 article by Lai & Yamaguchi 2006 which is relavent with our review, however without any bone assessment except calcium content, included in Discussion
34	D. Baião, C. Defreitas, L. Gomes, D. Silva, A. C. N. T. F. Correa, P. Pereira, E. Delaguila and V. M. F. Paschoalin	2017	Polyphenols from root, Tubercles and grains cropped in brazil: Chemical and nutritional characterization and their effects on human health and diseases							Nutrients					Review		Summarized the source of CA in fruit/vegetables and the protective effect of caffeic acid on UVA-irradiated human skin keratinocyte HaCaT cells by Pluemsamran et al. 2012
35	Y. Guo, T. Yin, X. Wang, F. Zhang, G. Pan, H. Lv, X. Wang, J. Owoicho Orgah, Y. Zhu and H. Wu	2017	Traditional uses, phytochemistry, pharmacology and toxicology of the genus Cimicifuga: A review							J Ethnopharmacol					Review		Summarized the source of CA in fruit/vegetables and the antioxidant effect of caffeic acid
36	M. T. Islam, S. Tabrez, N. R. Jabir, M. Ali, M. A. Kamal, L. Da Silva Araújo, J. V. De Oliveira Santos, A. M. O. F. Da Mata, R. P. S. De Aguiar and A. A. De Carvalho Melo Cavalcante	2018	An insight into the therapeutic potential of major coffee components							Current Drug Metabolism					Review		Summarized the biological acticities of CA but nothing on bone health
37	Swetha, R., Gayen, C., Kumar, D., Singh, T. D., Modi, G. and Singh, S. K.	2018	Biomolecular basis of matrix metallo proteinase-9 activity							Future Medicinal Chemistry					Review		Mentioned the inhibitory action of CA on MMP-9 in anticancer and anti-inflammation activities
38	B. Zhu, Q. L. Zhang, J. W. Hua, W. L. Cheng and L. P. Qin	2018	The traditional uses, phytochemistry, and pharmacology of Atractylodes macrocephala Koidz.: A review							J Ethnopharmacol					Review		Summarized the isolation of CA from rhizome of Atractylodes macrocephala Koidz
39	E. S. Chan, D. T. Bautista, Y. Zhu, Y. You, J. T. Long, W. Li and C. Chen	2018	Traditional Chinese herbal medicine for vascular dementia							Cochrane Database Syst Rev					Review		Not relevant
40	Gupta, C., Pacheco, C. and Prakash, D.	2018	Anti-Inflammatory Functional Foods							Nutraceuticals and Innovative Food Products for Healthy Living and Preventive Care					Book chapter		Not relevant
41	S. M. Barbalho, A. C. Araújo, C. R. Penteado Detregiachi, D. V. Buchaim and L. Guiguer É	2019	The Potential Role of Medicinal Plants in Bone Regeneration							Altern Ther Health Med					Review		Only speculated/ briefly mentioned the potential beneficial effects of CA on bone; Wu et al. 2012 [REF 37] is the only article reporting the effect of CA on bone health
42	E. P. Cherniack, S. Chekuri and H. F. Lee	2019	Potential non-neoplastic applications for polyphenols in stem cell utilization							Current Drug Targets					Review		Not relevant
43	M. Derakhshani, H. Abbaszadeh, A. A. Movassaghpour, A. Mehdizadeh, M. Ebrahimi-Warkiani and M. Yousefi	2019	Strategies for elevating hematopoietic stem cells expansion and engraftment capacity							Life Sciences					Review		Summarized the biological activities of CAPE, but not including those on bone health
44	Kiyama, R.	2019	Estrogenic Activity of Coffee Constituents							Nutrients					Review		Summarized the biological activities of CA & CAPE, including the bone protection by Folwarczna et al. 2015 [REF 46]
45	L. Menghini, L. Recinella, S. Leone, A. Chiavaroli, C. Cicala, L. Brunetti, S. Vladimir-Knežević, G. Orlando and C. Ferrante	2019	Devil's claw (Harpagophytum procumbens) and chronic inflammatory diseases: A concise overview on preclinical and clinical data							Phytotherapy Research					Review		Mentioned the presence of CA in devil's claw
46	K. M. S. Uddin Imam, Y. Xie, Y. Liu, F. Wang and F. Xin	2019	Cytotoxicity of Cichorium intybus L. Metabolites (Review)							Oncology Reports					Review		Summarized the detection of CA in Cichorium intybus L. extract and the biological activities, but nothing on bone health
47	V. Chander and G. Gangenahalli	2020	Emerging strategies for enhancing the homing of hematopoietic stem cells to the bone marrow after transplantation							Experimental Cell Research					Review		Summarized the effects of CAPE in ischemic injury and stem cell promoting via HIF-1alpha signaling
48	Osorio-Paz, I., Brunauer, R. and Alavez, S.	2020	Beer and its non-alcoholic compounds in health and disease							Critical Reviews in Food Science and Nutrition					Review		Summarized the estrogenic effect of CAPE on breast cancer cells by Jung et al. 2009, included in Discussion
49	M. Ramezani, M. S. Amiri, E. Zibaee, Z. Boghrati, Z. Ayati, A. Sahebkar and S. A. Emami	2020	A review on the phytochemistry, ethnobotanical uses and pharmacology of Borago species							Current Pharmaceutical Design					Review		Not relevant
50	L. Ravilla, S. Navaith Ahmed, P. Kalaivani and V. Vanitha	2020	A review on halodule uninervis – A potent seagrass							International Journal of Research in Pharmaceutical Sciences					Review		Summarized the detection of CA in Halodule uninervis plant and the antioxidant activities, but nothing on bone health
51	N. U. Robertson, A. Schoonees, A. Brand and J. Visser	2020	Pine bark (Pinus spp.) extract for treating chronic disorders							Cochrane Database Syst Rev					Review		Mentioned the presence of CA in the treatment, nothing on bone

## Sheet: Excluded- irrelevant topic
Excluded due to topic (147 articles)
No.	Authors	Year	Title							Journal				Remarks
1	A. S. Raj, J. A. Heddle, H. L. Newmark and M. Katz	1983	Caffeic acid as an inhibitor of DMBA-induced chromosomal breakage in mice assessed by bone-marrow micronucleus test							Mutat Res				Not related, nothing on bone
2	S. K. Abraham	1996	Anti-genotoxic effects in mice after the interaction between coffee and dietary constituents							Food Chem Toxicol				Not related
3	H. C. Blair, S. E. Jordan, T. G. Peterson and S. Barnes	1996	Variable effects of tyrosine kinase inhibitors on avian osteoclastic activity and reduction of bone loss in ovariectomized rats							Journal of Cellular Biochemistry				Not related
4	A. M. Miller, B. S. Allen and V. Ziboh	1997	Lipoxygenase metabolism is required for interleukin-3 dependent proliferation and cell cycle progression of the human M-07e cell line							J Cell Physiol				Not related
5	M. T. Rizzo, E. Regazzi, D. Garau, L. Akard, M. Dugan, H. S. Boswell, V. Rizzoli and C. Carlo-Stella	1999	Induction of apoptosis by arachidonic acid in chronic myeloid leukemia cells							Cancer Res				Not related
6	D. M. Salter, W. H. B. Wallace, J. E. Robb, H. Caldwell and M. O. Wright	2000	Human bone cell hyperpolarization response to cyclical mechanical strain is mediated by an interleukin-1β autocrine/paracrine loop							Journal of Bone and Mineral Research				Not related
7	X. C. Bai, D. Lu, J. Bai, H. Zheng, Z. Y. Ke, X. M. Li and S. Q. Luo	2004	Oxidative stress inhibits osteoblastic differentiation of bone cells by ERK and NF-kappaB							Biochem Biophys Res Commun				Not related
8	J. Y. Fu, Y. Xia and Y. Y. Zheng	2004	Antimutagenicity of propolis against some mutagens in vivo and in vitro							Biomedical and Environmental Sciences				Not related
9	Y. J. Chen, H. F. Liao, T. H. Tsai, S. Y. Wang and M. S. Shiao	2005	Caffeic acid phenethyl ester preferentially sensitizes CT26 colorectal adenocarcinoma to ionizing radiation without affecting bone marrow radioresponse							Int J Radiat Oncol Biol Phys				Not related, anticancer effects of CAPE
10	A. Matthias, R. S. Addison, K. G. Penman, R. G. Dickinson, K. M. Bone and R. P. Lehmann	2005	Echinacea alkamide disposition and pharmacokinetics in humans after tablet ingestion							Life Sci				Not related
11	A. Matthias, K. G. Penman, N. J. Matovic, K. M. Bone, J. J. De Voss and R. P. Lehmann	2005	Bioavailability of Echinacea constituents: Caco-2 monolayers and pharmacokinetics of the alkylamides and caffeic acid conjugates							Molecules				Not related
12	N. Orsolic, L. Sver, S. Terzić and I. Basić	2005	Peroral application of water-soluble derivative of propolis (WSDP) and its related polyphenolic compounds and their influence on immunological and antitumour activity							Vet Res Commun				Not related
13	J. B. Park	2005	N-coumaroyldopamine and N-caffeoyldopamine increase cAMP via beta 2-adrenoceptors in myelocytic U937 cells							FASEB Journal				Not related
14	S. Bhatnagar and J. S. Schorey	2006	Elevated mitogen-activated protein kinase signalling and increased macrophage activation in cells infected with a glycopeptidolipid-deficient Mycobacterium avium							Cellular Microbiology				Not related
15	V. Cavaliere, A. Glickman, L. Solari, D. Gammella, S. Hajos and É. Álvarez	2006	Establishment of PL104 cell line. Model for the study of the survival/death balance of tumour cells							Acta Bioquimica Clinica Latinoamericana				Not related
16	Y. L. Lai and M. Yamaguchi	2006	Phytocomponent p-hydroxycinnamic acid stimulates bone formation and inhibits bone resorption in rat femoral tissues in vitro							Mol Cell Biochem				Relevant to topic but lack of bone assessment, only have the effects of CA on calcium content, included in Discussion
17	N. Orsolić, A. B. Saranović and I. Basić	2006	Direct and indirect mechanism(s) of antitumour activity of propolis and its polyphenolic compounds							Planta Med				Not related
18	Q. Y. Tang, T. Kukita, Y. Ushijima, A. Kukita, K. Nagata, F. Sandra, T. Watanabe, K. Toh, Y. Okuma, S. Kawasaki, L. Rasubala, J. Teramachi, I. Miyamoto, Z. Wu and T. Iijima	2006	Regulation of osteoclastogenesis by Simon extracts composed of caffeic acid and related compounds: successful suppression of bone destruction accompanied with adjuvant-induced arthritis in rats							Histochem Cell Biol				Excluded because of mixture/crude extracts
19	F. A. Resende, J. M. Alves, C. C. Munari, J. M. Senedese, J. P. Sousa, J. K. Bastos and D. C. Tavares	2007	Inhibition of doxorubicin-induced mutagenicity by Baccharis dracunculifolia							Mutat Res				Not related
20	D. C. Tavares, W. M. Lira, C. B. Santini, C. S. Takahashi and J. K. Bastos	2007	Effects of propolis crude hydroalcoholic extract on chromosomal aberrations induced by doxorubicin in rats							Planta Med				Not related
21	S. Y. Bu, M. Lerner, B. J. Stoecker, E. Boldrin, D. J. Brackett, E. A. Lucas and B. J. Smith	2008	Dried plum polyphenols inhibit osteoclastogenesis by downregulating NFATc1 and inflammatory mediators							Calcified Tissue International				Not related
22	A. S. E. Elwakkad, K. ElShamy and H. Sibaii	2008	Fish liver oil and propolis as protective natural products against the effect of the anti-epileptic drug valproate on immunological markers of bone formation in rats							Epilepsy Research				Not related
23	J. H. Jun, S. H. Lee, H. B. Kwak, Z. H. Lee, S. B. Seo, K. M. Woo, H. M. Ryoo, G. S. Kim and J. H. Baek	2008	N-acetylcysteine stimulates osteoblastic differentiation of mouse calvarial cells							J Cell Biochem				Not related
24	V. Benkovic, A. H. Knezevic, N. Orsolic, I. Basic, S. Ramic, T. Viculin, F. Knezevic and N. Kopjar	2009	Evaluation of Radioprotective Effects of Propolis and its Flavonoid Constituents: In Vitro Study on Human White Blood Cells							Phytotherapy Research				Not related
25	V. Cavaliere, D. L. Papademetrio, M. Lorenzetti, P. Valva, M. V. Preciado, P. Gargallo, I. Larripa, M. B. Monreal, M. L. Pardo, S. E. Hajos, G. A. Blanco and E. M. Alvarez	2009	Caffeic Acid Phenylethyl Ester and MG-132 Have Apoptotic and Antiproliferative Effects on Leukemic Cells But Not on Normal Mononuclear Cells							Transl Oncol				Not related, anticancer effects of CAPE
26	V. Cavaliere, D. L. Papademetrio, M. Lorenzetti, P. Valva, M. V. Preciado, P. Gargallo, I. Larripa, M. B. Monreal, M. L. Pardo, S. E. Hajos, G. A. C. Blanco and E. M. C. Alvarez	2009	CAPE and MG-132 have apoptotic and antiproliferative effects on leukemic cells but not on normal mononuclear cells							Translational Oncology				Not related
27	Y. C. Chen, D. M. Sosnoski, U. H. Gandhi, L. J. Novinger, K. S. Prabhu and A. M. Mastro	2009	Selenium modifies the osteoblast inflammatory stress response to bone metastatic breast cancer							Carcinogenesis				Not related
28	L. Cui, Y. Y. Liu, T. Wu, C. M. Ai and H. Q. Chen	2009	Osteogenic effects of D()Β-3,4-dihydroxyphenyl lactic acid (salvianic acid A, SAA) on osteoblasts and bone marrow stromal cells of intact and prednisone-treated rats							Acta Pharmacologica Sinica				Not related
29	A. Zarbock, M. R. DiStasi, E. Smith, J. M. Sanders, G. Kronke, B. L. Harry, S. Von Vietinghoff, K. Buscher, J. L. Nadler and K. Ley	2009	Improved survival and reduced vascular permeability by eliminating or blocking 12/15-lipoxygenase in mouse models of Acute Lung Injury (ALI)							Journal of Immunology				Not related
30	M. Zych, J. Folwarczna and H. I. Trzeciak	2009	Natural phenolic acids may increase serum estradiol level in ovariectomized rats							Acta Biochimica Polonica				Relevant to topic but only have the effects of CA on estradiol levels, no bone assessment, included in Discussion
31	H. R. Yilmaz, E. Uz, A. Altunbasak, E. Sakalli and N. Ozçelik	2010	Anticlastogenic effect of caffeic acid phenethyl ester on cisplatin-induced chromosome aberrations in rat bone marrow cells							Toxicol Ind Health				Not related
32	B. Jiang, C. Ma, T. Motley, F. Kronenberg and E. J. Kennelly	2011	Phytochemical fingerprinting to thwart black cohosh adulteration: A 15 Actaea species analysis							Phytochemical Analysis				Not related
33	M. Kasai, H. Fukumitsu, H. Soumiya and S. Furukawa	2011	Caffeic acid phenethyl ester reduces spinal cord injury-evoked locomotor dysfunction							Biomed Res				Not related
34	H. Muhammad, M. R. Gomes-Carneiro, K. S. Poça, A. C. De-Oliveira, A. Afzan, S. A. Sulaiman, Z. Ismail and F. J. Paumgartten	2011	Evaluation of the genotoxicity of Orthosiphon stamineus aqueous extract							J Ethnopharmacol				Not related
35	S. Ramasahayam, H. N. Baraka, F. M. Abdel Bar, B. S. Abuasal, M. P. Widrlechner, K. A. Sayed and S. A. Meyer	2011	Effects of chemically characterized fractions from aerial parts of Echinacea purpurea and E. angustifolia on myelopoiesis in rats							Planta Med				Not related
36	Y. J. Wei, K. S. Tsai, L. C. Lin, Y. T. Lee, C. W. Chi, M. C. Chang, T. H. Tsai and S. C. Hung	2011	Catechin stimulates osteogenesis by enhancing PP2A activity in human mesenchymal stem cells							Osteoporosis International				Not related
37	P. Chuysinuan, P. Pavasant and P. Supaphol	2012	Preparation and Characterization of Caffeic Acid-Grafted Electrospun Poly(L-Lactic Acid) Fiber Mats for Biomedical Applications							Acs Applied Materials & Interfaces				Not related
38	G. M. Sulaiman	2012	Role of caffeic acid phenethyl ester on mitomycin C induced clastogenesis: analysis of chromosome aberrations, micronucleus, mitotic index and adenosine deaminase activity in vivo							J Appl Genet				Not related
39	L. Wang, J. Ho, C. Glackin and M. Martins-Green	2012	Specific pomegranate juice components as potential inhibitors of prostate cancer metastasis							Translational Oncology				Not related
40	A. I. Fahmi, A. M. El-Shehawi and M. A. Nagaty	2013	Antioxidant and antimutagenic activities of taif grape (Vitis vinifera) cultivars							American Journal of Biochemistry and Biotechnology				Not related
41	D. Yamanaka, M. Motoi, K. Ishibashi, N. N. Miura, Y. Adachi and N. Ohno	2013	Modulation of interferon-γ synthesis by the effects of lignin-like enzymatically polymerized polyphenols on antigen-presenting cell activation and the subsequent cell-to-cell interactions							Food Chem				Not related
42	Y. Yang, Y. Su, D. Wang, Y. Chen, T. Wu, G. Li, X. Sun and L. Cui	2013	Tanshinol attenuates the deleterious effects of oxidative stress on osteoblastic differentiation via wnt/FoxO3a signaling							Oxidative Medicine and Cellular Longevity				Not related
43	M. A. Zan, A. B. Ferraz, M. F. Richter, J. N. Picada, H. H. de Andrade, M. Lehmann, R. R. Dihl, E. Nunes, J. Semedo and J. Da Silva	2013	In vivo genotoxicity evaluation of an artichoke (Cynara scolymus L.) aqueous extract							J Food Sci				Not related
44	D. Bagdas, N. Y. Gul, A. Topal, S. Tas, M. O. Ozyigit, N. Cinkilic, Z. Gul, B. C. Etoz, S. Ziyanok, S. Inan, O. Turacozen and M. S. Gurun	2014	Pharmacologic overview of systemic chlorogenic acid therapy on experimental wound healing							Naunyn-Schmiedebergs Archives of Pharmacology				Not related
45	J. Glaser, M. Schultheis, S. Hazra, B. Hazra, H. Moll, U. Schurigt and U. Holzgrabe	2014	Antileishmanial lead structures from nature: Analysis of structure-activity relationships of a compound library derived from caffeic acid bornyl ester							Molecules				Not related
46	A. Günay, O. F. Arpağ, S. Atilgan, F. Yaman, Y. Atalay and I. Acikan	2014	Effects of caffeic acid phenethyl ester on palatal mucosal defects and tooth extraction sockets							Drug Des Devel Ther				Not related
47	M. Krzyzankova, S. Chovanova, P. Chlapek, M. Radsetoulal, J. Neradil, K. Zitterbart, J. Sterba and R. Veselska	2014	LOX/COX inhibitors enhance the antineoplastic effects of all-trans retinoic acid in osteosarcoma cell lines							Tumour Biol				Not related
48	H. Xuan, Z. Li, H. Yan, Q. Sang, K. Wang, Q. He, Y. Wang and F. Hu	2014	Antitumor activity of Chinese propolis in human breast cancer MCF-7 and MDA-MB-231 cells							Evidence-based Complementary and Alternative Medicine				Not related
49	D. Bagdas, B. C. Etoz, Z. Gul, S. Ziyanok, S. Inan, O. Turacozen, N. Y. Gul, A. Topal, N. Cinkilic, S. Tas, M. O. Ozyigit and M. S. Gurun	2015	In vivo systemic chlorogenic acid therapy under diabetic conditions: Wound healing effects and cytotoxicity/genotoxicity profile							Food and Chemical Toxicology				Not related
50	L. N. Cariddi, M. C. Sabini, F. M. Escobar, I. Montironi, F. Mañas, D. Iglesias, L. R. Comini, L. I. Sabini and A. M. Dalcero	2015	Polyphenols as possible bioprotectors against cytotoxicity and DNA damage induced by ochratoxin A							Environ Toxicol Pharmacol				Not related
51	L. D. Dat, N. P. Thao, B. H. Tai, B. T. T. Luyen, S. Kim, J. E. Koo, Y. S. Koh, N. T. Cuong, N. V. Thanh, N. X. Cuong, N. H. Nam, P. V. Kiem, C. V. Minh and Y. H. Kim	2015	Chemical constituents from Kandelia candel with their inhibitory effects on pro-inflammatory cytokines production in LPS-stimulated bone marrow-derived dendritic cells (BMDCs)							Bioorganic and Medicinal Chemistry Letters				Not related
52	S. K. Heo, E. K. Noh, D. J. Yoon, J. C. Jo, S. Koh, J. H. Baek, J. H. Park, Y. J. Min and H. Kim	2015	Rosmarinic acid potentiates ATRA-induced macrophage differentiation in acute promyelocytic leukemia NB4 cells							Eur J Pharmacol				Not related
53	S. Hooshmand, A. Kumar, J. Y. Zhang, S. A. Johnson, S. C. Chai and B. H. Arjmandi	2015	Evidence for anti-inflammatory and antioxidative properties of dried plum polyphenols in macrophage RAW 264.7 cells							Food & Function				Not related
54	H. S. Lee and J. H. Chang	2015	Antimicrobial spine-bone cement with caffeic acid phenethyl ester for controlled release formulation and in vivo biological assessments							MedChemComm				Not related
55	M. Charehsaz, R. Reis, S. Helvacioglu, H. Sipahi, E. Guzelmeric, E. T. Acar, G. Cicek, E. Yesilada and A. Aydin	2016	Safety evaluation of styrax liquidus from the viewpoint of genotoxicity and mutagenicity							Journal of Ethnopharmacology				Not related
56	Y. C. Chen, T. Y. Yuan, H. F. Zhang, D. S. Wang, Y. Yan, Z. R. Niu, Y. H. Lin, L. H. Fang and G. H. Du	2016	Salvianolic acid A attenuates vascular remodeling in a pulmonary arterial hypertension rat model							Acta Pharmacologica Sinica				Not related
57	F. V. M. Cunha, B. D. S. Gomes, B. D. S. Neto, A. R. Ferreira, D. P. De Sousa, M. D. C. D. C. E Martins and F. D. A. Oliveira	2016	Ferulic acid ethyl ester diminished Complete Freund's Adjuvant-induced incapacitation through antioxidant and anti-inflammatory activity							Naunyn-Schmiedeberg's Archives of Pharmacology				Not related
58	O. García-Martínez, E. De Luna-Bertos, J. Ramos-Torrecillas, C. Ruiz, E. Milia, M. L. Lorenzo, B. Jimenez, A. Sánchez-Ortiz and A. Rivas	2016	Phenolic Compounds in Extra Virgin Olive Oil Stimulate Human Osteoblastic Cell Proliferation							PLoS One				Not related
59	T. Khan, B. H. Abbasi, M. A. Khan and Z. K. Shinwari	2016	Differential Effects of Thidiazuron on Production of Anticancer Phenolic Compounds in Callus Cultures of Fagonia indica							Appl Biochem Biotechnol				Not related
60	L. Léotoing, F. Wauquier, M. J. Davicco, P. Lebecque, D. Gaudout, S. Rey, X. Vitrac, L. Massenat, S. Rashidi, Y. Wittrant and V. Coxam	2016	The phenolic acids of Agen prunes (dried plums) or Agen prune juice concentrates do not account for the protective action on bone in a rat model of postmenopausal osteoporosis							Nutrition Research				Not related
61	B. Lu, M. Li, F. Zhou, W. Huang, Y. Jiang, S. Mao, Y. Zhao and T. Lou	2016	The Osmanthus fragrans flower phenylethanoid glycoside-rich extract: Acute and subchronic toxicity studies							J Ethnopharmacol				Not related
62	B. Nie, X. Li, Y. Wei, M. Chen, J. Zhou, L. Lou, B. Dong, A. Wu, D. Zhang, L. Zhu, J. Zhao and L. Chai	2016	Xianfanghuomingyin, a Chinese compound medicine, modulates the proliferation and differentiation of T lymphocyte in a collagen-induced arthritis mouse model							Evidence-based Complementary and Alternative Medicine				Not related
63	A. Nugroho, J. S. Choi and H. J. Park	2016	Analysis of flavonoid composition of Korean herbs in the family of compositae and their utilization for health							Natural Product Sciences				Not related
64	J. C. Tseng, C. Y. Lin, L. C. Su, H. H. Fu, S. D. Yang and C. P. Chuu	2016	CAPE suppresses migration and invasion of prostate cancer cells via activation of non-canonical Wnt signaling							Oncotarget				Not related
65	W. Xu, F. Yang, Y. Zhang and X. Shen	2016	Protective effects of rosmarinic acid against radiation-induced damage to the hematopoietic system in mice							J Radiat Res				Not related
66	Y. Yang, Y. Su, D. Wang, Y. Chen, Y. Liu, S. Luo, T. Wu and L. Cui	2016	Tanshinol Rescues the Impaired Bone Formation Elicited by Glucocorticoid Involved in KLF15 Pathway							Oxidative Medicine and Cellular Longevity				Not related
67	W. Yin, X. Qi, Y. Zhang, J. Sheng, Z. Xu, S. Tao, X. Xie, X. Li and C. Zhang	2016	Advantages of pure platelet-rich plasma compared with leukocyte- and platelet-rich plasma in promoting repair of bone defects							J Transl Med				Not related
68	T. Younis, M. R. Khan and M. Sajid	2016	Protective effects of Fraxinus xanthoxyloides (Wall.) leaves against CCl(4) induced hepatic toxicity in rat							BMC Complement Altern Med				Not related
69	T. Younis, M. R. Khan, M. Sajid, M. Majid, Z. Zahra and N. A. Shah	2016	Fraxinus xanthoxyloides leaves reduced the level of inflammatory mediators during in vitro and in vivo studies							Bmc Complementary and Alternative Medicine				Not related
70	W. Zheng, X. Lu, Z. Fu, L. Zhang, X. Li, X. Xu, Y. Ren, Y. Lu, H. Fu and J. Tian	2016	Identification of candidate synovial membrane biomarkers after Achyranthes aspera treatment for rheumatoid arthritis							Biochimica et Biophysica Acta - Proteins and Proteomics				Not related
71	I. Aguiñiga-Sánchez, J. Cadena-Íñiguez, E. Santiago-Osorio, G. Gómez-García, V. M. Mendoza-Núñez, J. Rosado-Pérez, M. Ruíz-Ramos, V. M. Cisneros-Solano, E. Ledesma-Martínez, A. de Jesus Delgado-Bordonave and R. M. Soto-Hernández	2017	Chemical analyses and in vitro and in vivo toxicity of fruit methanol extract of Sechium edule var. Nigrum spinosum							Pharmaceutical Biology				Not related
72	G. Chen, X. Zhang, H. Lin, G. Huang, Y. Chen and L. Cui	2017	Tanshinol Alleviates Osteoporosis and Myopathy in Glucocorticoid-Treated Rats							Planta Medica				Not related
73	X. Chen, Y. Han, B. Zhang, Y. Liu, S. Wang, T. Liao, Z. Deng, Z. Fan, J. Zhang, L. He, W. Yue, Y. Li and X. Pei	2017	Caffeic acid phenethyl ester promotes haematopoietic stem/progenitor cell homing and engraftment							Stem Cell Res Ther				Not related, stem cell stimulating effects of CAPE (due to HIF-1alpha signaling)
74	R. B. Freitas, P. González, N. M. B. Martins, E. R. Andrade, M. J. Cesteros Morante, I. Conles Picos, S. Costilla García, L. F. Bauermann and J. P. Barrio	2017	Ameliorative effect of black grape juice on systemic alterations and mandibular osteoradionecrosis induced by whole brain irradiation in rats							International Journal of Radiation Biology				Not related
75	M. Gülmez, Ş. Okuyucu, R. Dokuyucu and H. Gökçe	2017	The effect of caffeic acid phenethyl ester and thymoquinone on otitis media with effusion in rats							Int J Pediatr Otorhinolaryngol				Not related
76	J. Han and W. Wang	2017	Effects of tanshinol on markers of bone turnover in ovariectomized rats and osteoblast cultures							PLoS ONE				Not related
77	M. Ishwarya and R. T. Narendhirakannan	2017	3,4 Dihydroxycinnamic acid stimulates immune system function by modifying the humoral antibody response – An in vivo study							Cellular Immunology				Not related
78	K. M. Kim, T. H. Kim and W. G. Jang	2017	Effect of cryptochlorogenic acid extracted from fruits of Sorbus commixta on osteoblast differentiation							Journal of the Korean Society of Food Science and Nutrition				Not related
79	S. H. Kook, S. R. Cheon, J. H. Kim, K. C. Choi, M. K. Kim and J. C. Lee	2017	Dietary hydroxycinnamates prevent oxidative damages to liver, spleen, and bone marrow cells in irradiation-exposed mice							Food Sci Biotechnol				Not related
80	M. Kostić, D. Kitić, M. B. Petrović, T. Jevtović-Stoimenov, M. Jović, A. Petrović and S. Živanović	2017	Anti-inflammatory effect of the Salvia sclarea L. ethanolic extract on lipopolysaccharide-induced periodontitis in rats							Journal of Ethnopharmacology				Not related
81	S. H. Lee, J. Y. Lee, Y. I. Kwon and H. D. Jang	2017	Anti-Osteoclastic Activity of Artemisia capillaris Thunb. Extract Depends upon Attenuation of Osteoclast Differentiation and Bone Resorption-Associated Acidification Due to Chlorogenic Acid, Hyperoside, and Scoparone							Int J Mol Sci				Not related
82	L. Liu and Y. Li	2017	Chondroprotective and anti-nociceptive effects of caffeoylquinic acid in osteoarthritis by downregulating catabolic activity and oxidative damage in chondrocytes							Biomedicine and Pharmacotherapy				Not related
83	V. Pittala, L. Vanella, L. Salerno, C. Di Giacomo, R. Acquaviva, M. Raffaele, G. Romeo, M. N. Modica, O. Prezzavento and V. Sorrenti	2017	Novel Caffeic Acid Phenethyl Ester (Cape) Analogues as Inducers of Heme Oxygenase-1							Curr Pharm Des				No direct assessment on bone status, used bone marrow stem cells, the interaction/relationship of HO-1 and bone protection is unknown. Not included in this systematic review.
84	E. Ramakrishna, K. Dev, P. Kothari, A. K. Tripathi, R. Trivedi and R. Maurya	2017	Phytochemical investigation of Kigelia pinnata leaves and identification of osteogenic agents							Medicinal Chemistry Research				Not related
85	D. A. Ribeiro, C. M. Cardoso, V. Q. Yujra, M. D. Viana, O. Aguiar, L. P. Pisani and C. T. F. Oshima	2017	Fluoride Induces Apoptosis in Mammalian Cells: In Vitro and In Vivo Studies							Anticancer Research				Not related
86	S. Torki, A. Soltani, H. Shirzad, N. Esmaeil and M. Ghatrehsamani	2017	Synergistic antitumor effect of NVP-BEZ235 and CAPE on MDA-MB-231 breast cancer cells							Biomedicine & Pharmacotherapy				Not related
87	M. Yates, M. R. Gomez, M. A. Martin-Luengo, V. Z. Ibañez and A. M. Martinez Serrano	2017	Multivalorization of apple pomace towards materials and chemicals. Waste to wealth							Journal of Cleaner Production				Not related
88	X. Zhang, J. Ding, C. Gou, T. Wen, L. Li, X. Wang, H. Yang, D. Liu, J. Lou, D. Chen, F. Ren and X. Li	2017	Qingchangligan formula attenuates the inflammatory response to protect the liver from acute failure induced by d-galactosamine/lipopolysaccharide in mice							J Ethnopharmacol				Not related
89	C. Zhu, N. Bao, S. Chen and J. Zhao	2017	Dioscin enhances osteoblastic cell differentiation and proliferation by inhibiting cell autophagy via the ASPP2/NF-κβ pathway							Mol Med Rep				Not related
90	J. Chen, Y. Liu, Y. Xu and Y. Wang	2017	[Analysis on metabolites with small molecule of serum in bone marrow suppression model mice with metabolomics method]							Se Pu				Not related
91	D. W. Al-dualimi, A. S. A. Majid, S. F. F. Al-Shimary, A. A. Al-Saadi, R. Al Zarzour, M. Asif, C. E. Oon and A. Majid	2018	50% Ethanol extract of Orthosiphon stamineus modulates genotoxicity and clastogenicity induced by mitomycin C							Drug and Chemical Toxicology				Not related
92	J. Blaze, J. Wang, L. Ho, N. Mendelev, F. Haghighi and G. M. Pasinetti	2018	Polyphenolic Compounds Alter Stress-Induced Patterns of Global DNA Methylation in Brain and Blood							Molecular Nutrition and Food Research				Not related
93	J. I. Castillo-Arellano, S. L. Guzmán-Gutiérrez, A. Ibarra-Sánchez, S. Hernández-Ortega, A. Nieto-Camacho, O. N. Medina-Campos, J. Pedraza-Chaverri, R. Reyes-Chilpa and C. González-Espinosa	2018	Jacareubin inhibits FcεRI-induced extracellular calcium entry and production of reactive oxygen species required for anaphylactic degranulation of mast cells							Biochem Pharmacol				Not related
94	D. T. A. da Veiga, R. Bringhenti, A. A. Bolignon, E. Tatsh, R. N. Moresco, F. V. Comim and M. O. Premaor	2018	The yerba mate intake has a neutral effect on bone: A case–control study in postmenopausal women							Phytotherapy Research				Not related
95	N. B. Erdal and M. Hakkarainen	2018	Construction of Bioactive and Reinforced Bioresorbable Nanocomposites by Reduced Nano-Graphene Oxide Carbon Dots							Biomacromolecules				Not related
96	S. L. Guzmán-Gutiérrez, A. Nieto-Camacho, J. I. Castillo-Arellano, E. Huerta-Salazar, G. Hernández-Pasteur, M. Silva-Miranda, O. A. ello-Nájera, O. Sepúlveda-Robles, C. I. Espitia and R. Reyes-Chilpa	2018	Mexican propolis: A source of antioxidants and anti-inflammatory compounds, and isolation of a novel chalcone and ε-caprolactone derivative							Molecules				Not related
97	S. T. Huang, C. C. Chang, J. S. Pang, H. S. Huang, S. C. Chou, M. C. Kao and H. L. You	2018	Drynaria fortunei Promoted Angiogenesis Associated With Modified MMP-2/TIMP-2 Balance and Activation of VEGF Ligand/Receptors Expression							Front Pharmacol				Not related
98	K. Y. Kim, T. W. Oh, J. Y. Ma and K. I. Park	2018	Ethanol Extract of Lycopus lucidus Turcz. ex Benth Inhibits Metastasis by Downregulation of Runx-2 in Mouse Colon Cancer Cells							Evidence-based Complementary and Alternative Medicine				Not related
99	J. H. Lee, Y. H. Chung, H. H. Kim, J. S. Bang, T. W. Jung, T. Park, J. Park, U. Kim, S. H. Lee and J. H. Jeong	2018	p-Coumaric acid stimulates longitudinal bone growth through increasing the serum production and expression levels of insulin-like growth factor 1 in rats							Biochemical and Biophysical Research Communications				Not related
100	X. Li, J. Lin, B. Chen, H. Xie and D. Chen	2018	Antioxidant and Cytoprotective Effects of Kukoamines A and B: Comparison and Positional Isomeric Effect							Molecules				Not related
101	N. V. V. Linh, N. T. Thinh, P. T. Kien, T. N. Quyen and H. D. Phu	2018	Injectable Nanocomposite Hydrogels and Electrosprayed Nano(Micro)Particles for Biomedical Applications							Advances in Experimental Medicine and Biology				Not related
102	Y. Liu, Z. Jia, M. P. Akhter, X. Gao, X. Wang, X. Wang, G. Zhao, X. Wei, Y. Zhou, X. Wang, C. W. Hartman, E. V. Fehringer, L. Cui and D. Wang	2018	Bone-targeting liposome formulation of Salvianic acid A accelerates the healing of delayed fracture Union in Mice							Nanomedicine: Nanotechnology, Biology, and Medicine				Not related
103	L. Melguizo-Rodríguez, F. J. Manzano-Moreno, E. De Luna-Bertos, A. Rivas, J. Ramos-Torrecillas, C. Ruiz and O. García-Martínez	2018	Effect of olive oil phenolic compounds on osteoblast differentiation							Eur J Clin Invest				Not related
104	K. Mu, J. Zhang, Y. Gu, H. Li, Y. Han, N. Cheng, X. Feng, G. Ding, R. Zhang, Y. Zhao and H. Wang	2018	Cord-derived mesenchymal stem cells therapy for liver cirrhosis in children with refractory Henoch-Schonlein purpura A case report							Medicine (United States)				Not related
105	Z. Noor, N. Kania, A. Azharuddin, N. Budhiparama, N. Nurdiana, N. N. Hidajat, F. Fatmawati and B. Setiawan	2018	The interaction of the active compounds of Labisia pumila on RANK–RANKL–OPG system							Clinical Nutrition Experimental				Not related
106	R. Pei, T. Si, Y. Lu, J. X. Zhou and L. Jiang	2018	Salvianolic acid A, a novel PI3K/Akt inhibitor, induces cell apoptosis and suppresses tumor growth in acute myeloid leukemia							Leukemia and Lymphoma				Not related
107	I. Sowa, R. Paduch, M. Strzemski, S. Zielińska, E. Rydzik-Strzemska, J. Sawicki, R. Kocjan, J. Polkowski, A. Matkowski, M. Latalski and M. Wójciak-Kosior	2018	Proliferative and antioxidant activity of Symphytum officinale root extract							Natural Product Research				Not related
108	Y. J. Yang, Z. Zhu, D. T. Wang, X. L. Zhang, Y. Y. Liu, W. X. Lai, Y. L. Mo, J. Li, Y. L. Liang, Z. Q. Hu, Y. J. Yu and L. Cui	2018	Tanshinol alleviates impaired bone formation by inhibiting adipogenesis via KLF15/PPARγ 32 signaling in GIO rats							Acta Pharmacologica Sinica				Not related
109	B. Yucel and M. Sonmez	2018	Repression of oxidative phosphorylation sensitizes leukemia cell lines to cytarabine							Hematology				Not related
110	J. Zhao, D. Ji, X. Zhai, L. Zhang, X. Luo and X. Fu	2018	Oral administration of Prunella vulgaris L improves the effect of taxane on preventing the progression of breast cancer and reduces its side effects							Frontiers in Pharmacology				Not related
111	M. A. M. Abo-Zeid, A. A. Farghaly, E. M. Hassan and N. S. Abdel-Samie	2019	Phenolic Compounds of Codiaeum variegatum Spirale Lessened Cytotoxic and Genotoxic Effects of Mitomycin C in Mice Somatic and Germ Cells							Cytology and Genetics				Not related
112	K. M. Amirova, P. Dimitrova, A. S. Marchev, I. Y. Aneva and M. I. Georgiev	2019	Clinopodium vulgare L. (wild basil) extract and its active constituents modulate cyclooxygenase-2 expression in neutrophils							Food and Chemical Toxicology				Not related
113	E. M. Fikry, A. M. Gad, A. H. Eid and H. H. Arab	2019	Caffeic acid and ellagic acid ameliorate adjuvant-induced arthritis in rats via targeting inflammatory signals, chitinase-3-like protein-1 and angiogenesis							Biomed Pharmacother				Anti-inflammatory properties of CA, nothing on bone
114	H. Kuramoto, K. Hirao, H. Yumoto, Y. Hosokawa, T. Nakanishi, D. Takegawa, A. Washio, C. Kitamura and T. Matsuo	2019	Caffeic Acid Phenethyl Ester (CAPE) Induces VEGF Expression and Production in Rat Odontoblastic Cells							BioMed Research International				Not reporting bone protection effects of CAPE
115	J. Y. Lee, L. E. Aguilar, C. H. Park and C. S. Kim	2019	UV light assisted coating method of polyphenol caffeic acid and mediated immobilization of metallic silver particles for antibacterial implant surface modification							Polymers				Not related
116	Y. L. Lee, L. H. Hsu, Y. H. Kuo and C. C. Lee	2019	Caffeic amide derivatives inhibit allergen-induced bone marrow-derived dendritic cell maturation							Pharmacol Rep				Not related
117	Y. Lei, Q. Ning, Y. Xia and Y. Wang	2019	Enzyme-oxidative-polymerization method for improving glycosaminoglycans stability and reducing calcification in bioprosthetic heart valves							Biomedical Materials (Bristol)				Not related
118	C. Ling, Z. Liu, M. Song, W. Zhang, S. Wang, X. Liu, S. Ma, S. Sun, L. Fu, Q. Chu, J. C. I. Belmonte, Z. Wang, J. Qu, Y. Yuan and G. H. Liu	2019	Modeling CADASIL vascular pathologies with patient-derived induced pluripotent stem cells							Protein and Cell				Not related
119	E. H. Marin, H. Paek, M. Li, Y. S. Ban, M. K. Karaga, R. Shashidharamurthy and X. Y. Wang	2019	Caffeic acid phenethyl ester exerts apoptotic and oxidative stress on human multiple myeloma cells							Investigational New Drugs				Not related, anticancer effects of CAPE
120	E. Park, J. Kim, M. C. Kim, S. Yeo, J. Kim, S. Park, M. Jo, C. W. Choi, H. S. Jin, S. W. Lee, W. Y. Li, J. W. Lee, J. H. Park, D. Huh and S. Y. Jeong	2019	Anti-Osteoporotic effects of kukoamine B isolated from LYCII radicis cortex extract on osteoblast and osteoclast cells and ovariectomized osteoporosis model mice							International Journal of Molecular Sciences				Not related
121	B. Reis, D. Vehlow, T. Rust, D. Kuckling and M. Müller	2019	Thermoresponsive Catechol Based-Polyelectrolyte Complex Coatings for Controlled Release of Bortezomib							Int J Mol Sci				Not related
122	T. Reiter, T. Panick, K. Schuhladen, J. A. Roether, J. Hum and A. R. Boccaccini	2019	Bioactive glass based scaffolds coated with gelatin for the sustained release of icariin							Bioact Mater				Not related
123	H. J. Sim, G. Bhattarai, J. Lee, J. C. Lee and S. H. Kook	2019	The Long-lasting Radioprotective Effect of Caffeic Acid in Mice Exposed to Total Body Irradiation by Modulating Reactive Oxygen Species Generation and Hematopoietic Stem Cell Senescence-Accompanied Long-term Residual Bone Marrow Injury							Aging Dis				Not related, antioxidant effects of CA, nothing on bone
124	I. D. Smičiklas, V. M. Lazić, L. S. Živković, S. J. Porobić, S. P. Ahrenkiel and J. M. Nedeljković	2019	Sorption of divalent heavy metal ions onto functionalized biogenic hydroxyapatite with caffeic acid and 3,4-dihydroxybenzoic acid							Journal of Environmental Science and Health - Part A Toxic/Hazardous Substances and Environmental Engineering				Not related
125	Y. Yang, X. J. Kang, W. F. Du, P. F. Lai and W. H. Ge	2019	Spectral-effect relationship between HPLC fingerprint and cell proliferation and differentiation of crude and sweated Dipsaci Radix							Chinese Traditional and Herbal Drugs				Not related
126	G. Zhang, G. Cui, S. Tong and Q. Cao	2019	Salvianolic acid a alleviates the renal damage in rats with chronic renal failure							Acta Cirurgica Brasileira				Not related
127	R. Zhao, J. Jiang, S. C. Xiao, C. L. Tan, F. Y. Wang, X. M. Xu and H. J. Xia	2019	Tao Hong Si Wu decoction reversed glucocorticoid-induced osteoporosis in zebrafish							Yaoxue Xuebao				Not related
128	B. Y. Chang, S. K. Lee, D. E. Kim, J. H. Bae, T. T. Ho, S. Y. Park, M. K. Lee and S. Y. Kim	2020	Effect of echinalkamide identified from Echinacea purpurea (L.) Moench on the inhibition of osteoclastogenesis and bone resorption							Scientific Reports				Not related
129	G. Dai, Z. Jiang, B. Sun, C. Liu, Q. Meng, K. Ding, W. Jing and W. Ju	2020	Caffeic Acid Phenethyl Ester Prevents Colitis-Associated Cancer by Inhibiting NLRP3 Inflammasome							Front Oncol				Not related, anticancer effects of CAPE
130	L. D. de Souza, I. P. C. Horta, L. D. Rosa, L. G. B. Lima, J. S. da Rosa, J. Montenegro, L. D. Santos, R. B. N. de Castro, O. Freitas-Silva and A. J. Teodoro	2020	Effect of the roasting levels ofCoffea arabicaL. extracts on their potential antioxidant capacity and antiproliferative activity in human prostate cancer cells							Rsc Advances				Not related
131	B. Ege, O. Yumrutas, M. Ege, M. Pehlivan and I. Bozgeyik	2020	Pharmacological properties and therapeutic potential of saffron (Crocus sativus L.) in osteosarcoma							J Pharm Pharmacol				Not related
132	V. Kaur, M. Kumar, A. Kumar and S. Kaur	2020	Butea monosperma (Lam.) Taub. Bark fractions protect against free radicals and induce apoptosis in MCF-7 breast cancer cells via cell-cycle arrest and ROS-mediated pathway							Drug and Chemical Toxicology				Not related
133	H. J. Kim and Y. Lee	2020	Endogenous collagenases regulate osteoclast fusion							Biomolecules				Not related
134	A. Kizaloglu, E. Kilicay, Z. Karahaliloglu, B. Hazer and E. B. Denkbas	2020	The preparation of chitosan membrane improved with nanoparticles based on unsaturated fatty acid for using in cancer-related infections							Journal of Bioactive and Compatible Polymers				Not related
135	V. Lazic, L. S. Zivkovic, D. Sredojevic, M. M. Fernandes, S. Lanceros-Mendez, S. P. Ahrenkiel and J. M. Nedeljkovic	2020	Tuning Properties of Cerium Dioxide Nanoparticles by Surface Modification with Catecholate-type of Ligands							Langmuir				Not related
136	L. Lazzarotto, P. Pfluger, G. G. Regner, F. M. Santos, D. G. Aguirre, V. B. Brito, D. J. Moura, N. M. dos Santos, J. N. Picada, B. Parmeggiani, M. R. Frusciante, G. Leipnitz and P. Pereira	2020	Lacosamide improves biochemical, genotoxic, and mitochondrial parameters after PTZ-kindling model in mice							Fundamental & Clinical Pharmacology				Not related
137	W. Li, X. Mao, H. Wu, M. Guo, X. Su, J. Lu, Q. Guo, T. Li, X. Wang, W. Su, Y. Zhang and N. Lin	2020	Deciphering the chemical profile and pharmacological mechanisms of Baihu-Guizhi decoction using ultra-fast liquid chromatography-quadrupole-time-of-flight tandem mass spectrometry coupled with network pharmacology-based investigation							Phytomedicine				Not related
138	M. Liu, F. Li, Y. Huang, T. Zhou, S. Chen, G. Li, J. Shi, N. Dong and K. Xu	2020	Caffeic Acid Phenethyl Ester Ameliorates Calcification by Inhibiting Activation of the AKT/NF-κB/NLRP3 Inflammasome Pathway in Human Aortic Valve Interstitial Cells							Front Pharmacol				Mechanistic study on anti-inflammatory properties of CAPE but no direct linkage or bone assessment data
139	Y. Mei, Z. Wang, Y. Zhang, T. Wan, J. Xue, W. He, Y. Luo, Y. Xu, X. Bai, Q. Wang and Y. Huang	2020	FA-97, a New Synthetic Caffeic Acid Phenethyl Ester Derivative, Ameliorates DSS-Induced Colitis Against Oxidative Stress by Activating Nrf2/HO-1 Pathway							Frontiers in Immunology				A new derivative but not reporting any bone protecting effects
140	C. M. Mota, D. D. S. Lima-Junior, F. B. Ferreira França, J. D. Aguillón Torres, P. D. S. C. Barros, F. M. Santiago, J. S. Silva, J. R. Mineo, D. S. Zamboni and T. W. P. Mineo	2020	Interplay Between Reactive Oxygen Species and the Inflammasome Are Crucial for Restriction of Neospora caninum Replication							Frontiers in Cellular and Infection Microbiology				Not related
141	C. Omene, L. Ma, J. Moore, H. Ouyang, I. Illa-Bochaca, W. Chou, M. S. Patel, C. Sebastiano, S. Demaria, J. H. Mao, K. Karagoz, M. L. Gatza and M. H. Barcellos-Hoff	2020	Aggressive mammary cancers lacking lymphocytic infiltration arise in irradiated mice and can be prevented by dietary intervention							Cancer Immunology Research				Not related
142	M. K. Ramar, Y. Dhayanandamoorthy, S. S. Ramachandran and R. Kandasamy	2020	HPLC-ESI-QqQ based standardization, mutagenic and genotoxic potential of methanol extract of Ziziphus mauritiana Lam leaves							Journal of Ethnopharmacology				Not related
143	C. Souza Campelo, P. Chevallier, C. Loy, R. Silveira Vieira and D. Mantovani	2020	Development, Validation, and Performance of Chitosan-Based Coatings Using Catechol Coupling							Macromolecular Bioscience				Not related
144	M. Staszowska-Karkut and M. Materska	2020	Phenolic composition, mineral content, and beneficial bioactivities of leaf extracts from black currant (Ribes nigrum l.), raspberry (rubus idaeus), and aronia (aronia melanocarpa)							Nutrients				Not related
145	A. Trifan, K. Skalicka-Woźniak, S. Granica, M. E. Czerwińska, A. Kruk, L. Marcourt, J. L. Wolfender, E. Wolfram, N. Esslinger, A. Grubelnik and S. V. Luca	2020	Symphytum officinale L.: Liquid-liquid chromatography isolation of caffeic acid oligomers and evaluation of their influence on pro-inflammatory cytokine release in LPS-stimulated neutrophils							J Ethnopharmacol				Not related
146	T. Younis, F. Jabeen, L. Jafri, A. Rasul, M. Manzoor, M. Shaheen and A. Riaz	2020	The protective potential of a: Fraxinus xanthoxyloides ethyl acetate fraction against CCl4-induced oxidative stress in the cardiac tissue of rats							RSC Advances				Not related
147	Y. H. Zhao, X. K. Pang, A. Nepal, X. C. Jiang, X. X. Xu, D. B. Zhao, G. Murtaza and Y. X. Ma	2020	Caffeic Acid Phenethyl Ester Effects: In Silico Study of its Osteoimmunological Mechanisms							Letters in Drug Design & Discovery				Relevant to our topic, but only have software prediction data on molecular targets (mainly contribute to its anticancer effects) without direct evidence on bone protection, included in Discussion.

## Sheet: Excluded-conference abstract
Excluded due to various reasons (4 abstracts)
No.	Authors	Year	Title							Journal					Type		Remarks
1	C. L. Si, P. P. Qin, Y. Zhang, H. Y. Hu, Y. F. Su and Z. Liu	2011	Screening of secondary metabolites from xylem of Eucommia ulmoides							16th International Symposium on Wood, Fiber and Pulping Chemistry - Proceedings, ISWFPC					Conference abstract		Not relevant
2	Holland, L., Mula, R. V. R., Machiah, D., Wang, X. Y. and Shashidharamurthy, R.	2016	Fluorinated Caffeic Acid Phenethyl Ester: a Novel Anti-osteogenic molecule to Attenuate Excessive Bone Damage during Autoimmune Arthritis							Faseb Journal					Conference abstract		Relavent but lack of detailed information, will include in Discussion.
3	G. Sereda, K. Rashwan, B. Karels and A. Fritza	2016	Novel materials for desensitizing and remineralizing dentifrices							Advanced Materials - TechConnect Briefs 2016					Conference abstract		Not relevant
4	Williams, B., Tsangari, E., Stansborough, R., Marino, V., Cantley, M., Dharmapatni, A., Gibson, R., Perilli, E. and Crotti, T.	2016	The Effect of Low Dose Caffeic Acid Phenethyl Ester on Joint Inflammation, Bone Loss and Gastrointestinal Inflammation in a Collagen Antibody-Induced Arthritis Murine Model												Conference abstract		Similar to the full paper that published by the same authors in 2017, Williams et al. 2017 REF[49]
